# Supplementary material for: Sex and gender considerations in low back pain clinical practice guidelines: a scoping review
Source: PubMed Central journal article supplement — BMJ Open Sport Exerc Med. 2020 Dec 30;6(1):e000972. doi: 10.1136/bmjsem-2020-000972 (PMC7780542; doi:10.1136/bmjsem-2020-000972), 2020-12-30
Supplement: bmjsem-2020-000972supp001.pdf [file bmjsem-2020-000972supp001.pdf]

### **Appendix A – Database Search Strategies**

#### **OVID Medline Epub Ahead of Print, In-Process & Other Non-Indexed Citations, Ovid**

#### **MEDLINE(R) Daily and Ovid MEDLINE(R) 1946 to Present**

Last searched: March 8, 2020

1. exp Low Back Pain/
2. low back pain.mp.
3. Non-specific low back pain.mp.
4. low back\*.mp.
5. low\* back pain.mp.
6. backache\*.mp.
7. exp Back Pain/
8. back pain\*.mp.
9. lumbar pain\*.mp.
10. exp Sciatica/
11. sciatica.mp.
12. lumbar spinal stenosis.mp.
13. exp Spinal Stenosis/
14. lumbar degenerative disc disease.mp.
15. exp Intervertebral Disc Degeneration/
16. intervertebral disc degeneration.mp.
17. lumbar DDD.mp.
18. non specific low back pain.mp.
19. NSLBP.mp.

20. lumbar fracture.mp.
21. exp Spinal Fractures/
22. lumbar #.mp.
23. exp Spondylitis, Ankylosing/
24. exp Spondylolisthesis/
25. exp Spondylarthritis/
26. exp Spondylitis/
27. spondyl\*.mp.
28. exp Sacrococcygeal Region/
29. sacrococcygeal region.mp.
30. exp Sciatic Neuropathy/
31. sciatic\*.mp.
32. low back-ache.mp.
33. low back ache.mp.
34. lumbago.mp.
35. exp Intervertebral Disc Displacement/
36. intervertebral disc displacement.mp.
37. dorsalgia.mp.
38. exp Spinal Diseases/
39. spinal disease\*.mp.
40. exp Lumbar Vertebrae/
41. lumbar vertebrae.mp.

42. 1 or 2 or 3 or 4 or 5 or 6 or 7 or 8 or 9 or 10 or 11 or 12 or 13 or 14 or 15 or 16 or 17 or 18 or 19 or 20 or 21 or 22 or 23 or 24 or 25 or 26 or 27 or 28 or 29 or 30 or 31 or 32 or 33 or 34 or 35 or 36 or 37 or 38 or 39 or 40 or 41
43. best practice guideline\*.mp.
44. exp Practice Guidelines as Topic/
45. clinical practice guideline\*.mp.
46. practice guideline\*.mp.
47. clinical guideline\*.mp.
48. 43 or 44 or 45 or 46 or 47
49. 42 and 48

## EMBASE

Last searched March 9, 2020

1. low back pain.mp.
2. exp low back pain/
3. non specific low back pain.mp.
4. non-specific low back pain.mp.
5. low back\*.mp.
6. low\* back pain.mp.
7. exp backache/
8. backache\*.mp.
9. back pain.mp.
10. back pain\*.mp.

11. lumbar pain\*.mp.
12. sciatica.mp.
13. exp sciatica/
14. lumbar spinal stenosis.mp.
15. exp lumbar spinal stenosis/
16. lumbar vertebral canal stenosis.mp.
17. lumbar degenerative disc disease.mp.
18. lumbar degenerative disk disease.mp.
19. intervertebral disc degeneration.mp.
20. exp intervertebral disk degeneration/
21. lumbar DDD.mp.
22. NSLBP.mp.
23. lumbar fracture.mp.
24. exp spine fracture/
25. lumbar#.mp.
26. exp ankylosing spondylitis/
27. exp spondylolisthesis/
28. exp spondylarthritis/
29. exp spondylitis/
30. spondyl\*.mp.
31. exp sacrococcygeal region/
32. sacrococcygeal region.mp.
33. exp sacrococcygeal region/

34. exp sciatic neuropathy/
35. sciatic\*.mp.
36. low back-ache.mp.
37. low back ache.mp.
38. lumbago.mp.
39. exp intervertebral disk hernia/
40. intervertebral disc displacement.mp.
41. dorsalgia.mp.
42. exp spine disease/
43. spinal disease.mp.
44. exp lumbar vertebra/
45. lumbar vertebra\*.mp.
46. 1 or 2 or 3 or 4 or 5 or 6 or 7 or 8 or 9 or 10 or 11 or 12 or 13 or 14 or 15 or 16 or 17 or  
18 or 19 or 20 or 21 or 22 or 23 or 24 or 25 or 26 or 27 or 28 or 29 or 30 or 31 or 32 or  
33 or 34 or 35 or 36 or 37 or 38 or 39
47. exp practice guideline/
48. clinical practice guideline\*.mp.
49. best practice guideline\*.mp.
50. clinical guideline\*.mp.
51. 41 or 42 or 43 or 44
52. 40 and 45

**NICE**

Last Searched: March 9, 2020

1. Low back pain

Filter: Guidance and policy

### **TRIP**

Last Searched: March 17, 2020

1. Low back pain

Filter: Guidelines

### **PEDro**

Last Searched: March 9, 2020

1. Pain

Filter: Body Part (lumbar spine, sacro-iliac joint, pelvis); Method (practice guideline)
