# Supplementary material for: Sex and gender considerations in low back pain clinical practice guidelines: a scoping review
Source: PubMed Central journal article supplement — BMJ Open Sport Exerc Med. 2020 Dec 30;6(1):e000972. doi: 10.1136/bmjsem-2020-000972 (PMC7780542; doi:10.1136/bmjsem-2020-000972), 2020-12-30
Supplement: bmjsem-2020-000972supp002.pdf [file bmjsem-2020-000972supp002.pdf]

**Appendix B – Excluded studies with reasons for exclusion**

## Excluded studies with reasons for exclusions

| Reference                                                                                                                                                                                                                                                                                                                                                                                                      | Reason for Exclusion      |
|----------------------------------------------------------------------------------------------------------------------------------------------------------------------------------------------------------------------------------------------------------------------------------------------------------------------------------------------------------------------------------------------------------------|---------------------------|
| Abenhaim L, Rossignol M, Valat JP, Nordin M, Avouac B, Blotman F, et al. The role of activity in the therapeutic management of back pain. Report of the International Paris Task Force on Back Pain. <i>Spine</i> . 2000;25(4 Suppl):1S-33S.                                                                                                                                                                   | Wrong year                |
| Adorian DE, Boureau F, Budowski M, Dietemann JL, Guillaumat M, Langlade A, et al. [Diagnostic and therapeutic management of common lumbago and sciatica of less than 3 months of duration. Recommendations of the ANAES. Agence Nationale d'Accreditation et d'Evaluation en Sante]. <i>Journal de radiologie</i> . 2000;81(11):1665–6.                                                                        | Not accessible in English |
| Agency for health care policy and research. Acute low back problems in adults: assessment and treatment. Acute Low Back Problems Guideline Panel. Agency for Health Care Policy and Research. <i>American family physician</i> . 1995;51(2):469–84.                                                                                                                                                            | Can't access              |
| Airaksinen O, Brox JI, Cedraschi C, Hildebrandt J, Klaber-Moffett J, Kovacs F, et al. Chapter 4: European guidelines for the management of chronic nonspecific low back pain. <i>European Spine Journal</i> . 2006;15(SUPPL. 2):S192–300.                                                                                                                                                                      | Wrong year                |
| Andersson GB. Diagnostic considerations in patients with back pain. <i>Physical medicine and rehabilitation clinics of North America</i> . 1998;9(2):309–22.                                                                                                                                                                                                                                                   | Wrong study design        |
| Ashton J, Butler M, Bridge M, Griffiths R, Hawtin J, Kendall N, et al. New Zealand acute low back pain guide, incorporating the guide to assessing psychosocial yellow flags in acute low back pain, October 2004 edition. 2004; Available from: <a href="https://www.acc.co.nz/assets/provider/acc1038-lower-back-pain-guide.pdf">https://www.acc.co.nz/assets/provider/acc1038-lower-back-pain-guide.pdf</a> | Wrong year                |
| Authority VW. Guidelines for the management of employees with compensable low back pain [Internet]. Melbourne : The Authority; 1996. Available from: <a href="https://trove.nla.gov.au/version/44947925">https://trove.nla.gov.au/version/44947925</a>                                                                                                                                                         | Can't access              |
| Bach SM, Holten KB. Guideline update: what's the best approach to acute low back pain?. <i>The Journal of family practice</i> . 2009;58(12):E1.                                                                                                                                                                                                                                                                | Can't access              |

|                                                                                                                                                                                                                                                                                   |                           |
|-----------------------------------------------------------------------------------------------------------------------------------------------------------------------------------------------------------------------------------------------------------------------------------|---------------------------|
| Back Pain in the Workplace: Management of Disability in Nonspecific Conditions : A Report of the Task Force on Pain in the Workplace of the International Association for the. Seattle: Intl Assn for the Study of Pain; 1995. 75 p.                                              | Can't access              |
| Beaumont B, Paice E. Back pain. Occasional paper (Royal College of General Practitioners). 1992;(58):36–8.                                                                                                                                                                        | Wrong study design        |
| Becker A, Chenot JF, Niebling W, Kochen MM. Guidelines for back pain - Evidence-based guidelines from the German Society of General Practice and Family Medicine. Zeitschrift fur Orthopadie und Ihre Grenzgebiete. 2004;142(6):716–9.                                            | Not accessible in English |
| Becker A, Hofmann W, Henze S, Dittmar F. Low back pain - Guideline update 2017. Medizinische Monatsschrift fur Pharmazeuten. 2018;41(7):260–7.                                                                                                                                    | Can't access              |
| Becker E, Timmer K, Horn S, Hussla B, Irle H, Knorr I, et al. Guidelines for the sociomedical assessment of performance in patients suffering from discopathy or associated diseases. Gesundheitswesen. 2003;65(1):19–39.                                                         | Not accessible in English |
| Bekkering GE, Hendriks HJM, Koes BW, Oostendorp RAB, Ostelo RWJG, Thomassen JMC, et al. Dutch physiotherapy guidelines for low back pain. Physiotherapy. 2003;89(2):82–96.                                                                                                        | Wrong year                |
| Belgian health care knowledge centre. KCE guideline on the treatment of low back pain and commentary on the role of opioid analgesics. Tijdschrift voor Geneeskunde. 2018;74(4):222–4.                                                                                            | Can't access              |
| Bigos S, Bowyer O, Braen G, Brown K, Deyo R, Haldeman S, et al. Acute low back problems in adults: assessment and treatment. Agency for Health Care Policy and Research. Clinical practice guideline Quick reference guide for clinicians. 1994;(14):iii–25.                      | Wrong study design        |
| Bigos SJ, Davis GE. Scientific application of sports medicine principles for acute low back problems. The Agency for Health Care Policy and Research Low Back Guideline Panel (AHCPR, Guideline #14). The Journal of orthopaedic and sports physical therapy. 1996;24(4):192–207. | Wrong study design        |
| Bogduk N. International Spine Intervention Society Practice Guidelines for spinal diagnostic and treatment procedures. 2004;                                                                                                                                                      | Can't access              |
| Borenstein DG. A clinician's approach to acute low back pain. American Journal of Medicine. 1997;102(1 A):16S-22S.                                                                                                                                                                | Wrong study design        |

|                                                                                                                                                                                                                                                              |                                         |
|--------------------------------------------------------------------------------------------------------------------------------------------------------------------------------------------------------------------------------------------------------------|-----------------------------------------|
| Borkan J, Reis S, Werner S, Ribak J, Porath A. [Guidelines for treating low back pain in primary care. The Israeli Low Back Pain Guideline Group]. <i>Harefuah</i> . 1996;130(3):145–224.                                                                    | Can't access                            |
| Boswell MV, Shah RV, Everett CR, Sehgal N, McKenzie Brown AM, Abdi S, et al. Interventional techniques in the management of chronic spinal pain: evidence-based practice guidelines. <i>Pain physician</i> . 2005;8(1):1–47.                                 | Not within the scope of PT <sup>a</sup> |
| Boswell MV, Trescot AM, Datta S, Schultz DM, Hansen HC, Abdi S, et al. Interventional techniques: evidence-based practice guidelines in the management of chronic spinal pain. <i>Pain physician</i> . 2007;10(1):7–111.                                     | Not within the scope of PT              |
| Bradley WGJ. Low back pain. <i>AJNR American journal of neuroradiology</i> . 2007;28(5):990–2.                                                                                                                                                               | Outdated version of CPG <sup>b</sup>    |
| Braillon A. Noninvasive treatments for acute, subacute, and chronic low back pain. <i>Annals of Internal Medicine</i> . 2017;167(11):831–2.                                                                                                                  | Wrong study design                      |
| Brighton SW. The management of acute low back pain in adults: A guide for the primary care physician. <i>South African Family Practice</i> . 2012;54(5):398–403.                                                                                             | Wrong study design                      |
| Brighton SW. The management of acute low back pain in adults: A guide for the primary care physician, part II. <i>South African Family Practice</i> . 2013;55(1):26–32.                                                                                      | Wrong study design                      |
| Bronfort G, Haas M, Evans R, Kawchuk G, Dagenais S. Evidence-informed management of chronic low back pain with spinal manipulation and mobilization. <i>Spine Journal</i> . 2008;8(1):213–25.                                                                | Wrong study design                      |
| Bronfort G, Haas M, Evans R, Leininger B, Triano J. Effectiveness of manual therapies: the UK evidence report. <i>Chiropractic &amp; osteopathy</i> . 2010;18(101245797):3.                                                                                  | Wrong study design                      |
| Brosseau L, Tugwell P, Wells GA, Robinson VA, Graham ID, Shea BJ, et al. Philadelphia Panel evidence-based clinical practice guidelines on selected rehabilitation interventions for low back pain. <i>Physical Therapy</i> 2001 Oct;81(10):1641-1674. 2001; | Wrong year                              |
| Browne W. Management of acute low back pain. <i>The New Zealand medical journal</i> . 1996;109(1028):323–4.                                                                                                                                                  | Wrong study design                      |

|                                                                                                                                                                                                                                                                                                                                                                                             |                           |
|---------------------------------------------------------------------------------------------------------------------------------------------------------------------------------------------------------------------------------------------------------------------------------------------------------------------------------------------------------------------------------------------|---------------------------|
| Burns AD. Guidelines address treatment of suspected spinal injuries. <i>Athletic Therapy Today</i> . 2001;6(3):49.                                                                                                                                                                                                                                                                          | Can't access              |
| Burton AK, Balague F, Cardon G, Eriksen HR, Henrotin Y, Lahad A, et al. Chapter 2. European guidelines for prevention in low back pain : November 2004. <i>European spine journal : official publication of the European Spine Society, the European Spinal Deformity Society, and the European Section of the Cervical Spine Research Society</i> . 2006;15 Suppl 2(9301980, b9y):S136-68. | Wrong year                |
| Burton AK, Waddell G. Clinical guidelines in the management of low back pain. <i>Bailliere's clinical rheumatology</i> . 1998;12(1):17-35.                                                                                                                                                                                                                                                  | Wrong study design        |
| Canadian Task Force on Preventive Care. Use of back belts to prevent occupational low-back pain: Recommendation statement from the Canadian Task Force on Preventive Health Care. <i>CMAJ</i> . 2003;169(3):213-4.                                                                                                                                                                          | Wrong year                |
| Chenot JF, Becker A, Niebling W, Kochen MM, Hildebrandt J, Pfungsten M, et al. Guidelines on low back pain: What level of diagnostic and which therapies are useful? <i>Zeitschrift fur Allgemeinmedizin</i> . 2003;79(3):112-6.                                                                                                                                                            | Not accessible in English |
| Chenot JF, Becker A, Niebling W, Kochen MM. A new DEGAM guideline: Low back pain. <i>Zeitschrift fur Allgemeinmedizin</i> . 2004;80(8):351-2.                                                                                                                                                                                                                                               | Not accessible in English |
| Chenot JF, Becker A, Niebling W, Kochen MM. DEGAM guidelines on low back pain: What level of diagnostic and which therapies are useful? <i>Zeitschrift fur Allgemeinmedizin</i> . 2004;80(8):353-7.                                                                                                                                                                                         | Not accessible in English |
| Chenot JF, Becker A. The national disease management guideline for low back pain: A summary for family medicine. <i>Zeitschrift fur Allgemeinmedizin</i> . 2011;87(6):260-7.                                                                                                                                                                                                                | Not accessible in English |
| Chenot JF, Becker A. Update of the national disease management guideline for low back pain. <i>Zeitschrift fur Allgemeinmedizin</i> . 2017;93(6):250-4.                                                                                                                                                                                                                                     | Not accessible in English |
| Chinese Association of Orthopedic Surgeons, Editorial Committee of the "Evidence-based guideline for the management of acute thoracolumbar injury" of Chinese Association of Orthopedic Surgeons. [Evidence-based guideline for the management of acute thoracolumbar injury]. <i>Zhonghua wai ke za zhi [Chinese journal of surgery]</i> . 2019;57(3):161-5.                               | Not accessible in English |

|                                                                                                                                                                                                                                                                                                                                                                                                                                                          |                            |
|----------------------------------------------------------------------------------------------------------------------------------------------------------------------------------------------------------------------------------------------------------------------------------------------------------------------------------------------------------------------------------------------------------------------------------------------------------|----------------------------|
| Chinese Association of Orthopedic Surgeons, Editorial Committee of the “Evidence-based guideline for the management of early onset scoliosis” of Chinese Association of Orthopedic Surgeons. [Evidence-based guideline for the management of early onset scoliosis]. <i>Zhonghua wai ke za zhi [Chinese journal of surgery]</i> . 2019;57(3):166–9.                                                                                                      | Not accessible in English  |
| Chou R, Loeser JD, Owens DK, Rosenquist RW, Atlas SJ, Baisden J, et al. Interventional therapies, surgery, and interdisciplinary rehabilitation for low back pain: an evidence-based clinical practice guideline from the American Pain Society. <i>Spine</i> . 2009;34(10):1066–77.                                                                                                                                                                     | Wrong year                 |
| Chou R, Qaseem A, Snow V, Casey D, Cross JTJ, Shekelle P, et al. Diagnosis and treatment of low back pain: a joint clinical practice guideline from the American College of Physicians and the American Pain Society. <i>Annals of internal medicine</i> . 2007;147(7):478–91.                                                                                                                                                                           | Wrong year                 |
| Clinical Guideline Subcommittee on Low Back Pain, American Osteopathic Association. American Osteopathic Association guidelines for osteopathic manipulative treatment (OMT) for patients with low back pain. <i>The Journal of the American Osteopathic Association</i> . 2010;110(11):653–66.                                                                                                                                                          | Not within the scope of PT |
| Clinical Standards Advisory Group. Back Pain: Report of a CSAG Committee on Back Pain. H.M. Stationery Office; 1995. 89 p.                                                                                                                                                                                                                                                                                                                               | Can't access               |
| Committee of the German Society for the Study of Pain, German society of rheumatology. Differential pain therapy for backache. Guidelines for classification and therapy for backache. Reported from the Committee of the German Society for the Study of Pain and the German Society of Rheumatology Consensus Conference: Dresden, February 1992. <i>Fortschritte der Medizin Supplement : die Kongressinformation für die Praxis</i> . 1992;136:1–15. | Not accessible in English  |
| Cutforth G, Peter A, Taenzer P. The Alberta Health Technology Assessment (HTA) Ambassador Program: The Development of a Contextually Relevant, Multidisciplinary Clinical Practice Guideline for Non-specific Low Back Pain: A Review. <i>Physiotherapy Canada Physiotherapie Canada</i> . 2011;63(3):278–86.                                                                                                                                            | Wrong study design         |
| Davis PC, Wippold FJ 2nd, Brunberg JA, Cornelius RS, De La Paz RL, Dormont PD, et al. ACR Appropriateness Criteria on low back pain. <i>Journal of the American College of Radiology : JACR</i> . 2009;6(6):401–7.                                                                                                                                                                                                                                       | Wrong study design         |
| Delcambre B, Jeantet M, Laversin S, Auberge T, Crenn O, Forestier R, et al. Diagnosis, management and follow-up of patients with chronic low back pain: Recommendations for the practice - December 2000. <i>Pratiques Medicales et Therapeutiques</i> . 2001;(17):18–23.                                                                                                                                                                                | Wrong year                 |

|                                                                                                                                                                                                                                                                                                                                                                        |                           |
|------------------------------------------------------------------------------------------------------------------------------------------------------------------------------------------------------------------------------------------------------------------------------------------------------------------------------------------------------------------------|---------------------------|
| Demetrious J. Guidelines in the evaluation and management of low back pain. North Carolina medical journal. 2008;69(2):175.                                                                                                                                                                                                                                            | Wrong study design        |
| Deng Z, Su J, Cai L, Ping A, Jin W, Wei R, et al. Evidence-based treatment for acute spinal cord injury. Neural Regeneration Research. 2011;6(23):1791–5.                                                                                                                                                                                                              | Can't access              |
| Deyo RA, Jarvik JG, Chou R. Low back pain in primary care. BMJ (Online). 2014;349((Chou) Department of Medical Informatics and Clinical Epidemiology, Oregon Health and Science University, Portland, OR, United States):g4266.                                                                                                                                        | Wrong study design        |
| Elleuch M, El Maghraoui A, Griene B, Nejmi M, Ndongo S, Serrie A. [Formalized consensus: clinical practice recommendations for the management of acute low back pain of the African patient]. The Pan African medical journal. 2015;22(101517926):240.                                                                                                                 | Not accessible in English |
| Eric Gonza. The Diagnosis and Treatment of Low Back Pain. 2001;                                                                                                                                                                                                                                                                                                        | Wrong year                |
| Estrade JL. Dutch clinical practice guideline for patients with low back pain. Kinesitherapie. 2015;15(159):36–40.                                                                                                                                                                                                                                                     | Can't access              |
| Evidence-informed primary care management of low back pain. Accelerating Change Transformation Team (ACTT) [Internet]. 2015; Available from: <a href="https://actt.albertadoctors.org/CPGs/Lists/CPGDocumentList/LBP-guideline.pdf#search=Low%20back%20pain">https://actt.albertadoctors.org/CPGs/Lists/CPGDocumentList/LBP-guideline.pdf#search=Low%20back%20pain</a> | Can't access              |
| Flanagan M. NICE guidance on the management of persistent low back pain and nurses' role. Nursing times. 2009;105(29):23.                                                                                                                                                                                                                                              | Wrong study design        |
| Friedrich M. Evidence and consensus based Austrian guidelines for the management of acute and chronic unspecific low back pain. Wiener Klinische Wochenschrift. 2007;119(5–6):189–97.                                                                                                                                                                                  | Not accessible in English |
| Grazio S, Curkovic B, Vlak T, Kes VB, Jelic M, Buljan D, et al. [Diagnosis and conservative treatment of low back pain: review and guidelines of the Croatian Vertebrologic Society]. Acta medica Croatica : casopis Hrvatske akademije medicinskih znanosti. 2012;66(4):259–94.                                                                                       | Not accessible in English |
| Greenstein JS, Kleiner DM. Guidelines for the pre-hospital management of the spine-injured athlete. Journal of Sports Chiropractic and Rehabilitation. 2000;14(4):105–10.                                                                                                                                                                                              | Can't access              |

|                                                                                                                                                                                                                                                                                                                                   |                           |
|-----------------------------------------------------------------------------------------------------------------------------------------------------------------------------------------------------------------------------------------------------------------------------------------------------------------------------------|---------------------------|
| Guevara-Lopez U, Covarrubias-Gomez A, Elias-Dib J, Reyes-Sanchez A, Rodriguez-Reyna TS, Consensus Group of Practice Parameters to Manage Low Back Pain. Practice guidelines for the management of low back pain. Consensus Group of Practice Parameters to Manage Low Back Pain. <i>Cirugia y cirujanos</i> . 2011;79(3):264–302. | Not accessible in English |
| Guidelines for the Management of Back-Injured Employees. 1993;                                                                                                                                                                                                                                                                    | Can't access              |
| Gulich M, Engel EM, Rose S, Klosterhuis H, Jackel WH. [Development of a guideline for rehabilitation of patients with low back pain-- phase 2: analysis of data of the classification of therapeutic procedures]. <i>Die Rehabilitation</i> . 2003;42(2):109–17.                                                                  | Not accessible in English |
| Haldeman S, Johnson CD, Chou R, Nordin M, Cote P, Hurwitz EL, et al. The Global Spine Care Initiative: care pathway for people with spine-related concerns. <i>European Spine Journal</i> . 2018;27(Supplement 6):901–14.                                                                                                         | Wrong study design        |
| Harris GR, Susman JL. Managing musculoskeletal complaints with rehabilitation therapy: summary of the Philadelphia Panel evidence-based clinical practice guidelines on musculoskeletal rehabilitation interventions. <i>The Journal of family practice</i> . 2002;51(12):1042–6.                                                 | Wrong patient population  |
| Hauk L. Low Back Pain: American College of Physicians Practice Guideline on Noninvasive Treatments. <i>American family physician</i> . 2017;96(6):407–8.                                                                                                                                                                          | Wrong study design        |
| Hoffman EG, Jain D, Radcliff K, Fischer CR, Hilibrand AS, Razi AE. Management of Adult Lumbar Spine Problems for General Orthopaedic Surgeons: A Practical Guide. Instructional course lectures. 2020;69(ifc, 7507149):597–606.                                                                                                   | Wrong study design        |
| Hoffmann R, Kandziora F, Korge A, Schnake K, Kothe R. Spine Trauma Treatment: Recommendations of the German Society for Orthopaedics and Trauma (DGOU). <i>Global Spine Journal</i> . 2018;8(2_suppl):4S.                                                                                                                         | Wrong study design        |
| Holland JP. Development of a clinical practice guideline for acute low back pain. <i>Current Opinion in Orthopaedics</i> . 1995;6(5):63–9.                                                                                                                                                                                        | Can't access              |
| Horsley L. ACP guidelines for the diagnosis and treatment of low back pain. <i>American Family Physician</i> . 2008;77(11):1607–15.                                                                                                                                                                                               | Wrong study design        |
| Hough PA, Van Rooyen FC, Bredenkamp E, Brough K, Ferreira M, Myburgh H, et al. Guidelines prescribed by general practitioners to patients with acute low back pain regarding “return to work.” <i>South African Family Practice</i> . 2006;48(10):15.                                                                             | Wrong study design        |



|                                                                                                                                                                                                                                                                                                                |                            |
|----------------------------------------------------------------------------------------------------------------------------------------------------------------------------------------------------------------------------------------------------------------------------------------------------------------|----------------------------|
| Houra K, Perovic D, Kvesic D, Rados I, Kovac D, Kapural L. First guidelines of Croatian interest group in diagnosing and treating lower back and radicular pain using minimally invasive diagnostic and therapeutic procedures. <i>Liječnicki vjesnik</i> . 2013;135(7–8):187–95.                              | Not accessible in English  |
| Houwert GJ. CBO guideline for diagnosis and treatment of acute and chronic a specific low back pain [6]. <i>Nederlands Tijdschrift voor Geneeskunde</i> . 2004;148(23):1171.                                                                                                                                   | Can't access               |
| Interspinous distraction procedures for lumbar spinal stenosis causing neurogenic claudication - guidance (IPG365). 2010; Available from: <a href="https://www.nice.org.uk/guidance/ipg365">https://www.nice.org.uk/guidance/ipg365</a>                                                                        | Not within the scope of PT |
| Itz CJ, Willems PC, Zeilstra DJ, Huygen FJPM. [Multidisciplinary practice guideline 'Invasive treatment of spine related low back pain']. <i>Nederlands tijdschrift voor geneeskunde</i> . 2013;157(32):A6030.                                                                                                 | Not accessible in English  |
| Jackson A, Hettinga DM, Mead J, Mercer C. Using consensus methods in developing clinical guidelines for exercise in managing persistent low back pain. <i>Physiotherapy</i> . 2009;95(4):302–11.                                                                                                               | Wrong year                 |
| Jimenez-Avila JM, Rubio-Flores EN, Gonzalez-Cisneros AC, Guzman-Pantoja JE, Gutierrez-Roman EA. Directrices en la aplicacion de la guia de practica clinica en la lumbalgia, Guidelines on the application of the clinical practice guideline on low back pain. <i>Cirugia y cirujanos</i> . 2019;86(1):24–32. | Not accessible in English  |
| Johanning E. Evaluation and management of occupational low back disorders. <i>American Journal of Industrial Medicine</i> . 2000;37(1):94–111.                                                                                                                                                                 | Wrong study design         |
| Jonckheer P, Demoulin C, Desomer A, Van Wambeke P. Low back and radicular pain: Which management in 2018 ? <i>Revue Medicale de Liege</i> . 2018;73(3):114–8.                                                                                                                                                  | Can't access               |
| JOSPT perspectives for patients. Low back pain: how does your physical therapist treat low back pain?. <i>The Journal of orthopaedic and sports physical therapy</i> . 2012;42(4):381.                                                                                                                         | Wrong study design         |
| Katz JN, Gall V. Agency for Health Care Policy and Research clinical practice guideline for acute low back pain. <i>Arthritis care and research : the official journal of the Arthritis Health Professions Association</i> . 1995;8(3):134–6.                                                                  | Wrong study design         |
| Kim YB, Lee SG, Park CW, Kim DJ, Park YK, Sung NJ, et al. Korean guideline development for the evaluation of permanent impairment of the spine: proposal by the Korean Academy of Medical Sciences Committee. <i>Journal of Korean medical science</i> . 2009;24 Suppl 2(ah4, 8703518):S307-13.                | Wrong patient population   |



|                                                                                                                                                                                                                                                                                                                                                                                                                                                                                  |                           |
|----------------------------------------------------------------------------------------------------------------------------------------------------------------------------------------------------------------------------------------------------------------------------------------------------------------------------------------------------------------------------------------------------------------------------------------------------------------------------------|---------------------------|
| Koes BW, Sanders RJ, Tuut MK. The Dutch Institute for Healthcare Improvement's (CBO) guideline for the diagnosis and treatment of aspecific acute and chronic low-back complaints. <i>Nederlands Tijdschrift voor Geneeskunde</i> . 2004;148(7):310–4.                                                                                                                                                                                                                           | Not accessible in English |
| Koes BW. Evidence-based management of acute low back pain. <i>Lancet</i> . 2007;370(9599):1595–6.                                                                                                                                                                                                                                                                                                                                                                                | Wrong study design        |
| Koyuncu H. Treatment guidelines in back pain. <i>Turkiye Fiziksel Tip ve Rehabilitasyon Dergisi</i> . 2007;53(SUPPL. 2):41–6.                                                                                                                                                                                                                                                                                                                                                    | Can't access              |
| Kreutzkamp B. National care guideline on low back pain. <i>Medizinische Monatsschrift fur Pharmazeuten</i> [Internet]. 2011;34(5). Available from: <a href="http://www.justscience.de/en/drugbase/medizinische-monatsschrift-fuer-pharmazeuten/artikel/print.html?tx_crondavdbmmp_pi[uid]=1703&amp;cHash=ef36b39e71">http://www.justscience.de/en/drugbase/medizinische-monatsschrift-fuer-pharmazeuten/artikel/print.html?tx_crondavdbmmp_pi[uid]=1703&amp;cHash=ef36b39e71</a> | Can't access              |
| Kuehn BM. Medical groups release new guidelines for treatment of low back pain. <i>JAMA</i> . 2007;298(19):2253.                                                                                                                                                                                                                                                                                                                                                                 | Wrong study design        |
| Labour Standards Bureau. Guidelines on worksite prevention of low back pain. Labour Standards Bureau Notification No. 547. Japan Industrial Safety and Health Association. <i>Industrial health</i> . 1997;35(2):143–72.                                                                                                                                                                                                                                                         | Wrong study design        |
| Ladeira CE. Evidence based practice guidelines for management of low back pain: physical therapy implications. <i>Revista brasileira de fisioterapia (Sao Carlos (Sao Paulo, Brazil))</i> . 2011;15(3):190–9.                                                                                                                                                                                                                                                                    | Wrong study design        |
| Laerum E, Dullerud R, Kirkesola G, Mengshoel AM, Nygaard OP, Skouen JS, et al. The Norwegian back pain network -- the communication unit. Acute low back pain: interdisciplinary clinical guidelines. 2002; Available from: <a href="http://www.sohs.com.sg/pdf/Norway_Acute_Low_Back.pdf">http://www.sohs.com.sg/pdf/Norway_Acute_Low_Back.pdf</a>                                                                                                                              | Wrong year                |
| Laerum E, Storheim K, Brox JI. [New clinical guidelines for low back pain]. <i>Tidsskrift for den Norske laegeforening : tidsskrift for praktisk medicin, ny raekke</i> . 2007;127(20):2706.                                                                                                                                                                                                                                                                                     | Not accessible in English |
| Laerum E. [Guidelines concerning low back pain]. <i>Tidsskrift for den Norske laegeforening : tidsskrift for praktisk medicin, ny raekke</i> . 2002;122(8):832.                                                                                                                                                                                                                                                                                                                  | Can't access              |
| Lahad A, Sarig-Bahat H, Israeli L. B.P. Guideline Work Group. [Israeli guidelines for prevention of low back pain]. <i>Harefuah</i> . 2007;146(4):253–320.                                                                                                                                                                                                                                                                                                                       | Not accessible in English |

|                                                                                                                                                                                                                                                                                                      |                           |
|------------------------------------------------------------------------------------------------------------------------------------------------------------------------------------------------------------------------------------------------------------------------------------------------------|---------------------------|
| Lai L. NICE should reconsider its recommendation to withdraw acupuncture from its 2016 guidelines on low back pain and sciatica. <i>European Journal of Integrative Medicine</i> . 2016;8(4):329–31.                                                                                                 | Wrong study design        |
| Latka D, Miekisiak G, Jarmuzek P, Lachowski M, Kaczmarczyk J. Treatment of lumbar disc herniation with radiculopathy. Clinical practice guidelines endorsed by The Polish Society of Spinal Surgery. <i>Neurologia i neurochirurgia polska</i> . 2016;50(2):101–8.                                   | Wrong study design        |
| Latorre Marques E, Kovacs F, Gil Del Real Ma T, Alonso P, Urrutia G. The Spanish version of the COST B13 guide: Clinical practice guidelines for non-specific low back pain based on scientific evidence. <i>DOLOR</i> . 2008;23(1):7–17.                                                            | Not accessible in English |
| Lehman Jr. RA, Kang DG, Bellabarba C. A new classification for complex lumbosacral injuries. <i>Spine Journal</i> . 2012;12(7):612–28.                                                                                                                                                               | Wrong study design        |
| Lentle BC, Brown JP, Khan A, Leslie WD, Levesque J, Lyons DJ, et al. Recognizing and reporting vertebral fractures: reducing the risk of future osteoporotic fractures. <i>Canadian Association of Radiologists journal = Journal l'Association canadienne des radiologistes</i> . 2007;58(1):27–36. | Wrong patient population  |
| Licciardone JC, Gatchel RJ Nonpharmacologic therapies for low back pain. <i>Annals of Internal Medicine</i> . 2017;167(8):606.                                                                                                                                                                       | Wrong study design        |
| Lie H. Clinical management of low back pain in primary health care. <i>Tidsskrift for den Norske laegeforening</i> . 1999;119(15):2215–8.                                                                                                                                                            | Not accessible in English |
| Lin I, Mak DB, Coffin J, O'Sullivan P. Primary care management of non-specific low back pain: key messages from recent clinical guidelines. <i>The Medical journal of Australia</i> . 2018;209(5):235.                                                                                               | Wrong study design        |
| Loerum E. Guidelines for acute low back pain. <i>Tidsskrift for den Norske Laegeforening</i> . 2002;122(8):832.                                                                                                                                                                                      | Not accessible in English |
| Lohman JJHM, Vreugdenhil-Vader CM. Standards of the Dutch general practitioners' Society on low back pain and lumbosacral radicular syndrome. <i>Pharmaceutisch Weekblad</i> . 1996;131(23):642–7.                                                                                                   | Can't access              |

|                                                                                                                                                                                                                                                                                                            |                            |
|------------------------------------------------------------------------------------------------------------------------------------------------------------------------------------------------------------------------------------------------------------------------------------------------------------|----------------------------|
| Lonnerberg F, Manniche C. Evidence-based treatment of low back pain 2002. <i>Ugeskrift for Laeger</i> . 2002;164(23):3080–1.                                                                                                                                                                               | Not accessible in English  |
| Low Back Pain. American College of Radiology [Internet]. 2015; Available from: <a href="https://acsearch.acr.org/docs/69483/Narrative/">https://acsearch.acr.org/docs/69483/Narrative/</a>                                                                                                                 | Outdated CPG               |
| MacPherson H. NICE for Some Interventions, But Not So NICE for Others: Questionable Guidance on Acupuncture for Osteoarthritis and Low-Back Pain. <i>Journal of alternative and complementary medicine (New York, NY)</i> . 2017;23(4):247–8.                                                              | Wrong study design         |
| Major-Helsloot M, Crous L, Grimmer-Somers K, Louw Q. Management of low back pain at primary care level in South Africa: Up to standards? <i>Physiotherapy (United Kingdom)</i> . 2015;101(SUPPL. 1):eS934–5.                                                                                               | Wrong study design         |
| Malmivaara A, Kotilainen E, Laasonen E, Poussa M, Rasmussen M, Kunnamo I. Treatment recommendations for diseases of lower back. Treatment Recommendation Group of Back Disorders Consensus Meeting. October 14-16, 1996, Finland. <i>Duodecim; laaketieteellinen aikakauskirja</i> . 1998;114(19):2004–15. | Can't access               |
| Manchikanti L, Abdi S, Atluri S, Benyamin RM, Boswell MV, Buenaventura RM, et al. An update of comprehensive evidence-based guidelines for interventional techniques in chronic spinal pain. Part II: guidance and recommendations. <i>Pain physician</i> . 2013;16(2 Suppl):S49-283.                      | Not within the scope of PT |
| Manchikanti L, Boswell MV, Singh V, Benyamin RM, Fellows B, Abdi S, et al. Comprehensive evidence-based guidelines for interventional techniques in the management of chronic spinal pain. <i>Pain physician</i> . 2009;12(4):699–802.                                                                     | Wrong year                 |
| Manchikanti L, Singh V, Helm S 2nd, Schultz DM, Datta S, Hirsch JA, et al. An introduction to an evidence-based approach to interventional techniques in the management of chronic spinal pain. <i>Pain physician</i> . 2009;12(4):E1-33.                                                                  | Wrong year                 |
| Manchikanti L, Staats PS, Singh V, Schultz DM, Vilims BD, Jasper JF, et al. Evidence-based practice guidelines for interventional techniques in the management of chronic spinal pain. <i>Pain Physician</i> . 2003;6(1):3–81.                                                                             | Not within the scope of PT |
| Mao JJ, Davis RT, Coeytaux R, Hullender-Rubin L, Kong J-T, MacPherson H, et al. Acupuncture for Chronic Low Back Pain: Recommendations to Medicare/Medicaid from the Society for Acupuncture Research. <i>Journal of alternative and complementary medicine (New York, NY)</i> . 2019;25(4):367–9.         | Wrong study design         |

|                                                                                                                                                                                                                                                                               |                           |
|-------------------------------------------------------------------------------------------------------------------------------------------------------------------------------------------------------------------------------------------------------------------------------|---------------------------|
| Marker-Hermann E, Kiltz U, Braun J. [Treatment of chronic back pain: current standards]. <i>Der Internist</i> . 2014;55(12):1410–8.                                                                                                                                           | Not accessible in English |
| Maschke M, Uberall MA. Evidence-based treatment of chronic low back pain. <i>Aktuelle Neurologie</i> . 2013;40(2):90–5.                                                                                                                                                       | Not accessible in English |
| Materson RS. The AHCPR practice guidelines for low back pain. <i>Bulletin on the rheumatic diseases</i> . 1996;45(2):6–8.                                                                                                                                                     | Wrong year                |
| May S, Donelson R. Evidence-informed management of chronic low back pain with the McKenzie method. <i>Spine Journal</i> . 2008;8(1):134–41.                                                                                                                                   | Wrong study design        |
| Mayer JM, Haldeman S, Tricco AC, Dagenais S. Management of chronic low back pain in active individuals. <i>Current sports medicine reports</i> . 2010;9(1):60–6.                                                                                                              | Wrong study design        |
| Mayor S. NICE recommends early intensive management of persistent low back pain. <i>BMJ (Clinical research ed)</i> . 2009;338(8900488, bmj, 101090866):b2115.                                                                                                                 | Wrong study design        |
| Mazanec DJ, Drucker Y, Segal AM. Lumbar canal stenosis: Nonoperative approaches to treatment. <i>Journal of Clinical Rheumatology</i> . 1997;3(2):89–94.                                                                                                                      | Wrong study design        |
| Mazel JA. Marked similarity between the Dutch Institute for Healthcare Improvement's guideline "Aspecific low back complaints" and the Dutch College of General Practitioners' guideline "Low back pain." <i>Nederlands Tijdschrift voor Geneeskunde</i> . 2004;148(7):304–5. | Wrong study design        |
| Medeiros JM. Clinical guidelines for the management of acute low back pain: An update. <i>Journal of Manual and Manipulative Therapy</i> . 1998;6(3):116.                                                                                                                     | Can't access              |
| Melcher C, Wegener B, Kanz KG, Mutschler WE, Jansson V, Birkenmaier C. Management of acute back pain. <i>Global Spine Journal</i> . 2012;2(Supplement 1).                                                                                                                     | Can't access              |
| Mercer C. Clinical guidelines for the physiotherapy management of persistent low back pain (LBP). 2006;                                                                                                                                                                       | Can't access              |
| Metzger RL. Evidence-based practice guidelines for the diagnosis and treatment of lumbar spinal conditions. <i>The Nurse practitioner</i> . 2016;41(12):30–7.                                                                                                                 | Wrong study design        |

|                                                                                                                                                                                                                                                                                                                                                                                                                                                                               |                            |
|-------------------------------------------------------------------------------------------------------------------------------------------------------------------------------------------------------------------------------------------------------------------------------------------------------------------------------------------------------------------------------------------------------------------------------------------------------------------------------|----------------------------|
| Negrini S, Giovannoni S, Minozzi S, Barneschi G, Bonaiuti D, Bussotti A, et al. Diagnostic therapeutic flow-charts for low back pain patients: the Italian clinical guidelines. <i>Europa medicophysica</i> . 2006;42(2):151–70.                                                                                                                                                                                                                                              | Wrong year                 |
| Negrini S, Monticone M, Chirchiglia S, Fabiani L, Gattinoni F, Giorgianni R, et al. Experience in Italy in the development and application of clinical guidelines for low back pain. <i>Europa medicophysica</i> . 2004;40(1):45–53.                                                                                                                                                                                                                                          | Wrong study design         |
| Nielens H, Zundert J, Mairiaux P, Gailly J, Van den Hecke N, Mazina D, et al. Chronic low back pain. <i>Good clinical practice (GCP)</i> . 2006;                                                                                                                                                                                                                                                                                                                              | Outdated CPG               |
| Nordin M, Randhawa K, Torres P, Yu H, Haldeman S, Brady O, et al. The Global Spine Care Initiative: a systematic review for the assessment of spine-related complaints in populations with limited resources and in low- and middle-income communities. <i>European spine journal : official publication of the European Spine Society, the European Spinal Deformity Society, and the European Section of the Cervical Spine Research Society</i> . 2018;27(Suppl 6):816–27. | Wrong study design         |
| Nordin M, Welser S, Campello MA, Pietrek M. Self-care techniques for acute episodes of low back pain. <i>Best Practice and Research: Clinical Rheumatology</i> . 2002;16(1):89–104.                                                                                                                                                                                                                                                                                           | Wrong study design         |
| NSW Agency for Clinical Innovation. Management of people with acute low back pain model of care. NSW Health. 2016.                                                                                                                                                                                                                                                                                                                                                            | Wrong study design         |
| O’Sullivan K, O’Keeffe M, O’Sullivan P. NICE low back pain guidelines: opportunities and obstacles to change practice. <i>British journal of sports medicine</i> . 2017;51(22):1632–3.                                                                                                                                                                                                                                                                                        | Wrong study design         |
| Oland G, Skjelbred O, Vik O, Karlsen M. [Guidelines concerning acute low back pain]. <i>Tidsskrift for den Norske laegeforening : tidsskrift for praktisk medicin, ny raekke</i> . 2002;122(11):1144.                                                                                                                                                                                                                                                                         | Not retrievable in English |
| Oliveira CB, Maher CG, Pinto RZ, Traeger AC, Lin C-WC, Chenot J-F, et al. Clinical practice guidelines for the management of non-specific low back pain in primary care: an updated overview. <i>European spine journal : official publication of the European Spine Society, the European Spinal Deformity Society, and the European Section of the Cervical Spine Research Society</i> . 2018;27(11):2791–803.                                                              | Wrong study design         |
| Oostendorp RAB, Huijbregts PA. Low back pain: the time to become invested in clinical practice guidelines is now. <i>Physiotherapy Canada Physiotherapie Canada</i> . 2011;63(2):131–9.                                                                                                                                                                                                                                                                                       | Wrong study design         |

|                                                                                                                                                                                                                                                                                                                                                                                                                |                            |
|----------------------------------------------------------------------------------------------------------------------------------------------------------------------------------------------------------------------------------------------------------------------------------------------------------------------------------------------------------------------------------------------------------------|----------------------------|
| Oostendorp RAB, Scholten-Peeters GGM., Swinkels RAHM, Bekkering GE, Heijmans MWFGJ, Huijbregts PA, et al. Evidence-Based Practice in Physical and Manual Therapy: Development and Content of Dutch National Practice Guidelines for Patients with Non-Specific Low Back Pain. <i>Journal of Manual and Manipulative Therapy</i> . 2004;12(1):21–31.                                                            | Wrong study design         |
| Paganoni S. Evidence-Based Physiatry: Clinical Practice Guideline: Noninvasive Treatments for Low Back Pain. <i>American journal of physical medicine &amp; rehabilitation</i> . 2018;97(10):763.                                                                                                                                                                                                              | Wrong study design         |
| Parfenov VA, Yakhno NN, Davydov OS, Kukushkin ML, Churyukanov MV, Golovacheva VA, et al. Chronic nonspecific (musculoskeletal) low back pain. Guidelines of the Russian Society for the Study of Pain (RSSP). <i>Nevrologiya, Neiropsikhiatriya, Psikhosomatika</i> . 2019;11((Yakupov) Kazan State Medical University, Ministry of Health of Russia, 49 Butlerov St., Kazan 420012, Russian Federation):7–16. | Not accessible in English  |
| Petit A, Fassier JB, Rousseau S, Mairiaux P, Roquelaure Y. French good practice guidelines for medical and occupational surveillance of the low back pain risk among workers exposed to manual handling of loads. <i>Annals of occupational and environmental medicine</i> . 2015;27(101609244):18.                                                                                                            | Wrong study design         |
| Petit A, Rozenberg S, Fassier JB, Rousseau S, Mairiaux P, Roquelaure Y. Pre-return-to-work medical consultation for low back pain workers. Good practice recommendations based on systematic review and expert consensus. <i>Annals of physical and rehabilitation medicine</i> . 2015;58(5):298–304.                                                                                                          | Not within the scope of PT |
| Philadelphia panel. Development of evidence-based clinical practice guidelines: The results of the Philadelphia panel. <i>Physiotherapy Theory and Practice</i> . 2001;17(4):213–4.                                                                                                                                                                                                                            | Wrong study design         |
| Phillips JA, Forrester B, Brown KC. Low back pain: prevention and management. <i>AAOHN journal : official journal of the American Association of Occupational Health Nurses</i> . 1996;44(1):40–3.                                                                                                                                                                                                             | Wrong study design         |
| Pillastrini P, Gardenghi I, Bonetti F, Capra F, Guccione A, Mugnai R, et al. An updated overview of clinical guidelines for chronic low back pain management in primary care. <i>Joint Bone Spine</i> . 2012;79(2):176–85.                                                                                                                                                                                     | Wrong study design         |
| Plantin A. Low back pain: Diagnosis and treatment based on the APTA guidelines. <i>Kinesitherapie</i> . 2016;16(172):30–9.                                                                                                                                                                                                                                                                                     | Can't access               |
| Pohjolainen T, Leinonen V, Frantén J, Haanpää M, Jousimaa J, Karppinen J, et al. [Update on Current Care Guideline: Low back pain]. <i>Duodecim</i> . 2015;131(1):92–4.                                                                                                                                                                                                                                        | Not accessible in English  |

|                                                                                                                                                                                                                                                                                                                                |                            |
|--------------------------------------------------------------------------------------------------------------------------------------------------------------------------------------------------------------------------------------------------------------------------------------------------------------------------------|----------------------------|
| Poitras S, Rossignol M, Dionne C, Tousignant M, Truchon M, Arsenault B, et al. An interdisciplinary clinical practice model for the management of low-back pain in primary care: The CLIP project. <i>BMC Musculoskeletal Disorders</i> . 2008;9((Neveu) Constance Lethbridge Rehabilitation Centre, Montreal, QC, Canada):54. | Wrong year                 |
| Pongratz V.D., Spath M. What helps to ease back pain? Guidelines for symptomatic treatment. <i>MMW-Fortschritte der Medizin</i> . 2001;143(18):26–9.                                                                                                                                                                           | Can't access               |
| Rauk RL, Gargiulo CA, Ruoff GE, Schnitzer TJ, Trapp RG. Chronic low back pain: new perspectives and treatment guidelines for primary care: Part I. Managed care interface. 1998;11(2):72–82.                                                                                                                                   | Can't access               |
| Rauk RL, Gargiulo CA, Ruoff GE, Schnitzer TJ, Trapp RG. Chronic low back pain: new perspectives and treatment guidelines for primary care: Part II. Managed care interface. 1998;11(3):71–5.                                                                                                                                   | Can't access               |
| Reis S, Lahad A. [Clinical guidelines for diagnosis and treatment of acute low back pain]. <i>Harefuah</i> . 2007;146(8):631–44.                                                                                                                                                                                               | Can't access               |
| Reis S, Lahad A. [Clinical guidelines for diagnosis and treatment of chronic low back pain]. <i>Harefuah</i> . 2008;147(8–9):735–48.                                                                                                                                                                                           | Can't access               |
| Reith W, Nabhan A, Kelm J, Naumann N, Ahlhelm F. [Differential diagnosis of back pain]. <i>Der Radiologe</i> . 2006;46(6):443–53.                                                                                                                                                                                              | Not accessible in English  |
| Resnick DK, Choudhri TF, Dailey AT, Groff MW, Khoo L, Matz PG, et al. Guidelines for the performance of fusion procedures for degenerative disease of the lumbar spine. Part 2: assessment of functional outcome. <i>Journal of neurosurgery Spine</i> . 2005;2(6):639–46.                                                     | Not within the scope of PT |
| Resnick DK, Groff MC. Evidence-based guidelines in lumbar spine surgery. <i>Progress in neurological surgery</i> . 2006;19(0076033):123–34.                                                                                                                                                                                    | Not within the scope of PT |
| Resnick DK, Malone DG, Ryken TC. Guidelines for the use of discography for the diagnosis of painful degenerative lumbar disc disease. <i>Neurosurgical focus</i> . 2002;13(2):E12.                                                                                                                                             | Not within the scope of PT |
| Rossignol M, Poitras S, Dionne C, Tousignant M, Truchon M, Arsenault B, et al. An interdisciplinary guideline development process: the Clinic on Low-back pain in Interdisciplinary Practice (CLIP) low-back pain guidelines. <i>Implementation science</i> : IS. 2007;2(101258411):36.                                        | Wrong study design         |



|                                                                                                                                                                                                                                                                                                                                                                                                                 |                           |
|-----------------------------------------------------------------------------------------------------------------------------------------------------------------------------------------------------------------------------------------------------------------------------------------------------------------------------------------------------------------------------------------------------------------|---------------------------|
| Rousing R, Jensen RK, Fruensgaard S, Strom J, Brogger HA, Degn JDM, et al. Danish national clinical guidelines for surgical and nonsurgical treatment of patients with lumbar spinal stenosis. <i>European spine journal : official publication of the European Spine Society, the European Spinal Deformity Society, and the European Section of the Cervical Spine Research Society</i> . 2019;28(6):1386–96. | Wrong study design        |
| Rudwaleit M, Marker-Hermann E. [Management of nonspecific low back pain. The new national guidelines 2011]. <i>Zeitschrift für Rheumatologie</i> . 2012;71(6):485–9.                                                                                                                                                                                                                                            | Not accessible in English |
| Sanders SH, Rucker KS, Anderson KO, Harden RN, Jackson KW, Vicente PJ, et al. Clinical practice guidelines for chronic non-malignant pain syndrome patients. <i>Journal of back and musculoskeletal rehabilitation</i> . 1995;5(2):115–20.                                                                                                                                                                      | Wrong patient population  |
| Savigny P, Kuntze S, Watson P, Underwood M, Ritchie G, Cotterell M, et al. Low back pain: early management of persistent non-specific low back pain: full guideline. 2009; Available from: <a href="http://www.ncbi.nlm.nih.gov/pubmedhealth/PMH0005442/pdf/PubMedHealth_PMH0005442.pdf">http://www.ncbi.nlm.nih.gov/pubmedhealth/PMH0005442/pdf/PubMedHealth_PMH0005442.pdf</a>                                | Wrong study design        |
| Savigny P, Watson P, Underwood M, Guideline Development Group. Early management of persistent non-specific low back pain: summary of NICE guidance. <i>BMJ (Clinical research ed)</i> . 2009;338(8900488, bmj, 101090866):b1805.                                                                                                                                                                                | Wrong study design        |
| Schaafstra A, Bons S, Borg M, Spinnewijn W, Koes B, Ostelo R, et al. Standard of the Dutch College of General Practitioners on lumbosacral radicular syndrome (first revision). <i>Huisarts en Wetenschap</i> . 2005;48(4):171–8.                                                                                                                                                                               | Not accessible in English |
| Schers H, Braspenning J, Drijver R, Wensing M, Grol R. Low back pain in general practice: reported management and reasons for not adhering to the guidelines in The Netherlands. <i>The British journal of general practice : the journal of the Royal College of General Practitioners</i> . 2000;50(457):640–4.                                                                                               | Wrong study design        |
| Sixta S, Moore FO, Ditillo MF, Fox AD, Garcia AJ, Holena D, et al. Screening for thoracolumbar spinal injuries in blunt trauma: An eastern association for the surgery of trauma practice management guideline. <i>Journal of Trauma and Acute Care Surgery</i> . 2012;73(5 SUPPL.4):S326–32.                                                                                                                   | Wrong patient population  |
| Snook SH. Self-care guidelines for the management of nonspecific low back pain. <i>Journal of Occupational Rehabilitation</i> . 2004;14(4):243–53.                                                                                                                                                                                                                                                              | Wrong study design        |

|                                                                                                                                                                                                                                |                    |
|--------------------------------------------------------------------------------------------------------------------------------------------------------------------------------------------------------------------------------|--------------------|
| Somerville S. Guideline: In low back pain, nonpharmacologic treatments are recommended. <i>Annals of Internal Medicine</i> . 2017;166(12):JC62.                                                                                | Wrong study design |
| Spitzer WO. Scientific approach to the assessment and management of activity-related spinal disorders. A monograph for clinicians. Report of the Quebec Task Force on Spinal Disorders. <i>Spine</i> . 1987;12(7 Suppl):S1-59. | Can't access       |
| Staal JB, Hlobil H, Van Tulder MW, Waddell G, Burton AK, Koes BW, et al. Occupational health guidelines for the management of low back pain: an international comparison. <i>Occup Environ Med</i> . 2003;60(9):618–26.        | Wrong study design |
| Stahlman GC, Hanley Jr. EN. Surgical management of spinal fractures: Guidelines for evaluation, patient selection, and surgical timing. <i>Neurosurgery Quarterly</i> . 1999;9(1):73–86.                                       | Can't access       |
| State of Florida Agency for Health Care Administration. Florida medical practice guidelines for low back pain or injury. 1996;                                                                                                 | Can't access       |
| Steven ID, Fraser RD. Clinical practice guidelines. Particular reference to the management of pain in the lumbosacral spine. <i>Spine</i> . 1996;21(13):1593–6.                                                                | Wrong study design |
| Steven ID, Fraser RD. Spine update clinical practice guidelines. Particular reference to the management of pain in the lumbosacral spine. <i>Spine</i> . 1996;21(13):1593–6.                                                   | Wrong study design |
| Steven ID. The management of work caused lumbosacral injury. Development and content of professionally agreed guidelines. <i>Australian family physician</i> . 1995;24(4):600–8.                                               | Can't access       |
| Stevenson K, Hay E. An integrated care pathway for the management of low back pain. <i>Physiotherapy</i> . 2004;90(2):91–6.                                                                                                    | Wrong study design |
| Stockwell S. New Clinical Guideline for Low Back Pain Says Try Nondrug Therapies First. <i>The American journal of nursing</i> . 2017;117(5):16.                                                                               | Wrong study design |
| Susman J. AHCPR guideline on acute low back problems. <i>American family physician</i> . 1995;51(2):334–40.                                                                                                                    | Wrong year         |
| Taenzer P, Findlay T, Harstall C. Using the Alberta primary care low back pain guideline in practice. <i>Pain Research and Management</i> . 15(2):75.                                                                          | Wrong study design |
| Texas Workers' Compensation Commission. Texas Spine Treatment Guidelines. 1994;                                                                                                                                                | Can't access       |

|                                                                                                                                                                                                                                                                                                                                                                                                              |                         |
|--------------------------------------------------------------------------------------------------------------------------------------------------------------------------------------------------------------------------------------------------------------------------------------------------------------------------------------------------------------------------------------------------------------|-------------------------|
| The Diagnosis and Treatment of Low Back Pain Work Group Department of Veterans Affairs Department of Defense. VA/DoD clinical practice guideline for diagnosis and treatment of low back pain (version 2.0). 2017; Available from: <a href="https://www.healthquality.va.gov/guidelines/Pain/lbp/">https://www.healthquality.va.gov/guidelines/Pain/lbp/</a>                                                 | Outdated version of CPG |
| The Korean Society for Meridian and Acupoint. Clinical guideline on acupuncture treatment for low back pain. 2013;                                                                                                                                                                                                                                                                                           | Can't access            |
| The State of Florida Agency for Health Care Administration Florida Department of Health. Universe of Florida patients with low back pain or injury - Medical practice guidelines. <i>Journal of Back and Musculoskeletal Rehabilitation</i> . 1999;12(1):35–65.                                                                                                                                              | Wrong year              |
| Thomeczek C, Lampert U, Brune K, Hasenbring M, Kramer J, Niebling W, et al. The guidelines-clearing procedures for acute back pain. <i>Zeitschrift fur Orthopadie und Ihre Grenzgebiete</i> . 2003;141(1):11–7.                                                                                                                                                                                              | Can't access            |
| Thompson H. Clinical practice guideline series update. <i>The Journal of neuroscience nursing : journal of the American Association of Neuroscience Nurses</i> . 2012;44(2):111.                                                                                                                                                                                                                             | Wrong study design      |
| Timm KE. Therapeutic exercise guidelines for rehabilitating lumbar spine injuries in athletes. <i>Athletic Therapy Today</i> . 1999;4(2):17–21.                                                                                                                                                                                                                                                              | Wrong study design      |
| Van Der Bijl G, Lems WF, Netelenbos JC, Koes BW, Tuut MK, Mazel JA, et al. CBO guideline for diagnosis and treatment of acute and chronic aspecific low back pain [5]. <i>Nederlands Tijdschrift voor Geneeskunde</i> . 2004;148(17):858–60.                                                                                                                                                                 | Can't access            |
| Van Tulder M, Becker A, Bekkering T, Breen A, Carter T, Gil del Real MT, et al. European guidelines for the management of acute nonspecific low back pain in primary care [with consumer summary]. 2004; Available from: <a href="https://www.ncbi.nlm.nih.gov/pmc/articles/PMC3454540/pdf/586_2006_Article_1071.pdf">https://www.ncbi.nlm.nih.gov/pmc/articles/PMC3454540/pdf/586_2006_Article_1071.pdf</a> | Outdated version of CPG |
| Van Tulder M, Becker A, Bekkering T, Breen A, Del Real MTG, Hutchinson A, et al. Chapter 3: European guidelines for the management of acute nonspecific low back pain in primary care. <i>European Spine Journal</i> . 2006;15(SUPPL. 2):S169–91.                                                                                                                                                            | Wrong year              |
| Van Tulder M, Kovacs F, Muller G, Airaksinen O, Balague F, Broos L, et al. European guidelines for the management of low back pain. <i>Acta Orthopaedica Scandinavica, Supplement</i> . 2002;73(305):20–5.                                                                                                                                                                                                   | Wrong study design      |
| Van Wambeke P, Desomer A, Jonckheer P, Depreitere B. The Belgian national guideline on low back pain and radicular pain: key roles for rehabilitation, assessment of rehabilitation potential and the PRM specialist. <i>European journal of physical and rehabilitation medicine</i> . 2019;((Depreitere) Department of Neurosurgery, University Hospitals Leuven, Leuven, Belgium).                        | Wrong study design      |

|                                                                                                                                                                                                                                                                                                                                                                                           |                         |
|-------------------------------------------------------------------------------------------------------------------------------------------------------------------------------------------------------------------------------------------------------------------------------------------------------------------------------------------------------------------------------------------|-------------------------|
| Vogel S. NICE clinical guidelines. Low back pain: The early management of persistent non-specific back pain. <i>International Journal of Osteopathic Medicine</i> . 2009;12(4):113–4.                                                                                                                                                                                                     | Wrong study design      |
| Waddell G, Burton AK. Occupational health guidelines for the management of low back pain at work: evidence review. <i>Occup Med (Lond)</i> . 2001;51(2):124–35.                                                                                                                                                                                                                           | Can't access            |
| Waddell G, McIntosh A, Hutchinson A, Lewis M. <i>Clinical Guidelines for the Management of Acute Low Back Pain</i> . 1999;                                                                                                                                                                                                                                                                | Wrong study design      |
| Watters WC 3rd, Baisden J, Gilbert TJ, Kreiner S, Resnick DK, Bono CM, et al. Degenerative lumbar spinal stenosis: an evidence-based clinical guideline for the diagnosis and treatment of degenerative lumbar spinal stenosis. <i>The spine journal : official journal of the North American Spine Society</i> . 2008;8(2):305–10.                                                       | Outdated version of CPG |
| WCB British Columbia. <i>The Diagnosis and Treatment of Low Back Pain</i> . 1995;                                                                                                                                                                                                                                                                                                         | Wrong year              |
| Webster BS, Courtney TK, Huang YH, Matz S, Christiani DC. Physicians' initial management of acute low back pain versus evidence-based guidelines. Influence of sciatica. <i>Journal of general internal medicine : official journal of the Society for Research and Education in Primary Care Internal Medicine</i> . 2005;20(12):1132–5.                                                 | Wrong study design      |
| Weiss HR, Negrini S, Rigo M, Kotwicki T, Hawes MC, Grivas TB, et al. Indications for conservative management of scoliosis (SOSORT guidelines). <i>Studies in health technology and informatics</i> . 2008;135((Weiss, Negrini, Rigo, Kotwicki, Hawes, Grivas, Maruyama, Landauer) Asklepios Katharina Schroth Spinal Deformities Rehabilitation Centre, Bad Sobernheim, Germany.):164–70. | Wrong year              |
| Wilson N, Pope C, Roberts L, Crouch R. Governing healthcare: finding meaning in a clinical practice guideline for the management of non-specific low back pain. <i>Social science &amp; medicine (1982)</i> . 2014;102(ut9, 8303205):138–45.                                                                                                                                              | Wrong study design      |
| Winer CE, Booth GC, Henke P, Jones LE, Lee LA, Niall PD. Guide to the assessment of percentage “impairment” of the back, neck and pelvis. <i>Australasian College of Rehabilitation Medicine. The Medical journal of Australia</i> . 1992;157(6):412–4.                                                                                                                                   | Can't access            |
| Wise J. NICE recommends exercise and not acupuncture for low back pain. <i>BMJ (Clinical research ed)</i> . 2016;352(8900488, bmj, 101090866):i1765.                                                                                                                                                                                                                                      | Wrong study design      |
| <sup>a</sup> Physiotherapy<br><sup>b</sup> Clinical practice guideline                                                                                                                                                                                                                                                                                                                    |                         |
