# Supplementary material for: Sex and gender considerations in low back pain clinical practice guidelines: a scoping review
Source: PubMed Central journal article supplement — BMJ Open Sport Exerc Med. 2020 Dec 30;6(1):e000972. doi: 10.1136/bmjsem-2020-000972 (PMC7780542; doi:10.1136/bmjsem-2020-000972), 2020-12-30
Supplement: bmjsem-2020-000972supp004.pdf [file bmjsem-2020-000972supp004.pdf]

**Appendix D – AGREE II**

AGREE II scores of the included guidelines for each domain and the overall quality rating

| Reference             | Domains        |                |                |                |                |                | OA <sup>g</sup> | Quality <sup>h</sup> |
|-----------------------|----------------|----------------|----------------|----------------|----------------|----------------|-----------------|----------------------|
|                       | 1 <sup>a</sup> | 2 <sup>b</sup> | 3 <sup>c</sup> | 4 <sup>d</sup> | 5 <sup>e</sup> | 6 <sup>f</sup> |                 |                      |
| Arvin et al. 2016     | 86             | 69             | 80             | 67             | 48             | 100            | 5.5             | H                    |
| Brosseau et al. 2012  | 86             | 44             | 36             | 78             | 21             | 21             | 4               | L                    |
| Bussieres et al. 2018 | 94             | 75             | 89             | 86             | 90             | 88             | 6               | H                    |
| Cheng et al. 2012     | 42             | 50             | 33             | 78             | 21             | 0              | 4               | L                    |
| Chenot et al. 2017    | 22             | 31             | 30             | 61             | 21             | 38             | 3               | L                    |
| Chiodo et al. 2010    | 83             | 28             | 35             | 89             | 19             | 50             | 4.5             | L                    |
| Chou et al. 2018      | 53             | 47             | 23             | 97             | 46             | 92             | 4               | L                    |
| Chutkan et al. 2020   | 92             | 75             | 67             | 94             | 35             | 54             | 5               | A                    |
| Deer et al. 2019      | 28             | 25             | 29             | 67             | 10             | 58             | 3               | L                    |
| Delitto et al. 2012   | 53             | 81             | 47             | 100            | 8              | 0              | 4.5             | L                    |
| Globe et al. 2016     | 83             | 72             | 75             | 78             | 21             | 100            | 5.5             | H                    |
| Hegmann et al. 2016   | 72             | 47             | 52             | 89             | 21             | 46             | 4.5             | L                    |
| Hegmann et al. 2019   | 83             | 64             | 57             | 67             | 21             | 75             | 5               | A                    |
| Hussein et al. 2016   | 11             | 31             | 1              | 53             | 10             | 25             | 2.5             | L                    |
| Jun et al. 2017       | 83             | 47             | 50             | 56             | 2              | 71             | 4               | L                    |
| Kassolik et al. 2017  | 75             | 53             | 14             | 83             | 42             | 75             | 4               | A                    |
| Kreiner et al. 2013   | 86             | 19             | 48             | 94             | 0              | 29             | 4               | L                    |
| Kreiner et al. 2014   | 86             | 25             | 49             | 97             | 15             | 13             | 4               | L                    |
| Kuijjer et al. 2014   | 58             | 69             | 47             | 83             | 23             | 83             | 4.5             | A                    |
| LBP TOP Group 2017    | 92             | 31             | 28             | 92             | 21             | 0              | 3.5             | L                    |
| Lee et al. 2013       | 39             | 56             | 32             | 72             | 19             | 67             | 3.5             | L                    |
| Pangarker et al. 2019 | 75             | 72             | 53             | 86             | 4              | 50             | 4               | A                    |
| Patel et al. 2016     | 56             | 67             | 58             | 81             | 21             | 67             | 4               | A                    |

|                          |     |    |    |     |    |     |      |   |
|--------------------------|-----|----|----|-----|----|-----|------|---|
| Petit et al. 2016        | 64  | 50 | 31 | 33  | 2  | 0   | 2.5  | L |
| Petit et al. 2016        | 50  | 36 | 26 | 36  | 6  | 54  | 3    | L |
| Picelli et al. 2016      | 75  | 36 | 39 | 94  | 8  | 75  | 4    | A |
| Qaseem et al. 2017       | 100 | 58 | 85 | 94  | 15 | 100 | 5    | A |
| Rached et al. 2013       | 89  | 42 | 39 | 86  | 8  | 75  | 3.5  | A |
| Sparks et al. 2017       | 58  | 36 | 17 | 69  | 29 | 58  | 3.5  | L |
| Staal et al. 2013        | 89  | 61 | 5  | 100 | 10 | 0   | 3    | A |
| Stochkendahl et al. 2017 | 81  | 56 | 77 | 86  | 19 | 88  | 4.5  | A |
| Thorson et al. 2018      | 83  | 78 | 56 | 81  | 48 | 96  | 5.5  | A |
| Valdecañas et al. 2017   | 53  | 53 | 55 | 89  | 19 | 46  | 4    | L |
| Van Wambeke et al. 2017  | 92  | 86 | 86 | 94  | 88 | 96  | 6    | H |
| Wong et al. 2017         | 44  | 19 | 52 | 83  | 4  | 54  | 3.5  | L |
| Zhao et al. 2016         | 69  | 44 | 21 | 50  | 0  | 50  | 2.5  | L |
| Mean                     | 69  | 51 | 45 | 79  | 22 | 55  | 4.08 |   |
| Standard deviation       | 22  | 19 | 23 | 17  | 21 | 32  | 0.94 |   |

<sup>a</sup>Scope and purpose<sup>b</sup>Stakeholder involvement<sup>c</sup>Rigour of development<sup>d</sup>Clarity of presentation<sup>e</sup>Applicability<sup>f</sup>Editorial independence<sup>g</sup>Overall assessment score<sup>h</sup>The quality was indicated as *H* high, *A* average, and *L* low
